# Supplementary material
Source: publisher site journal article supplement (https://www.dovepress.com/article/272140)
Supplement: Supplementary file 1 [file get_supplementary_file.php]

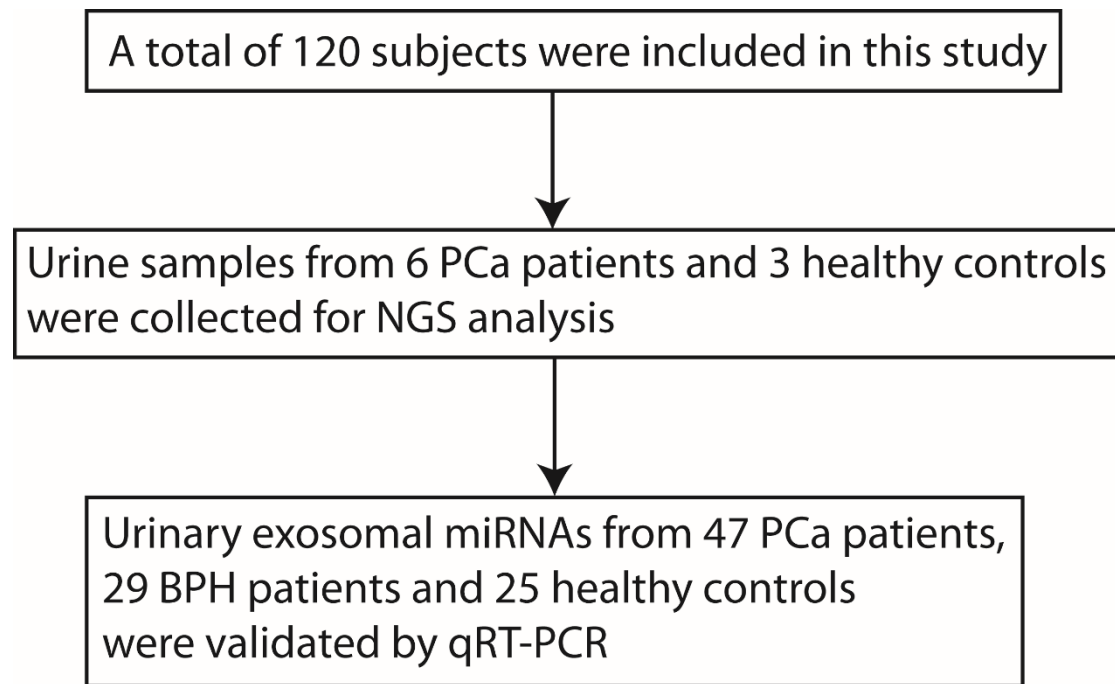

**Supplemental Figure S1. Flow chart of the study design.**

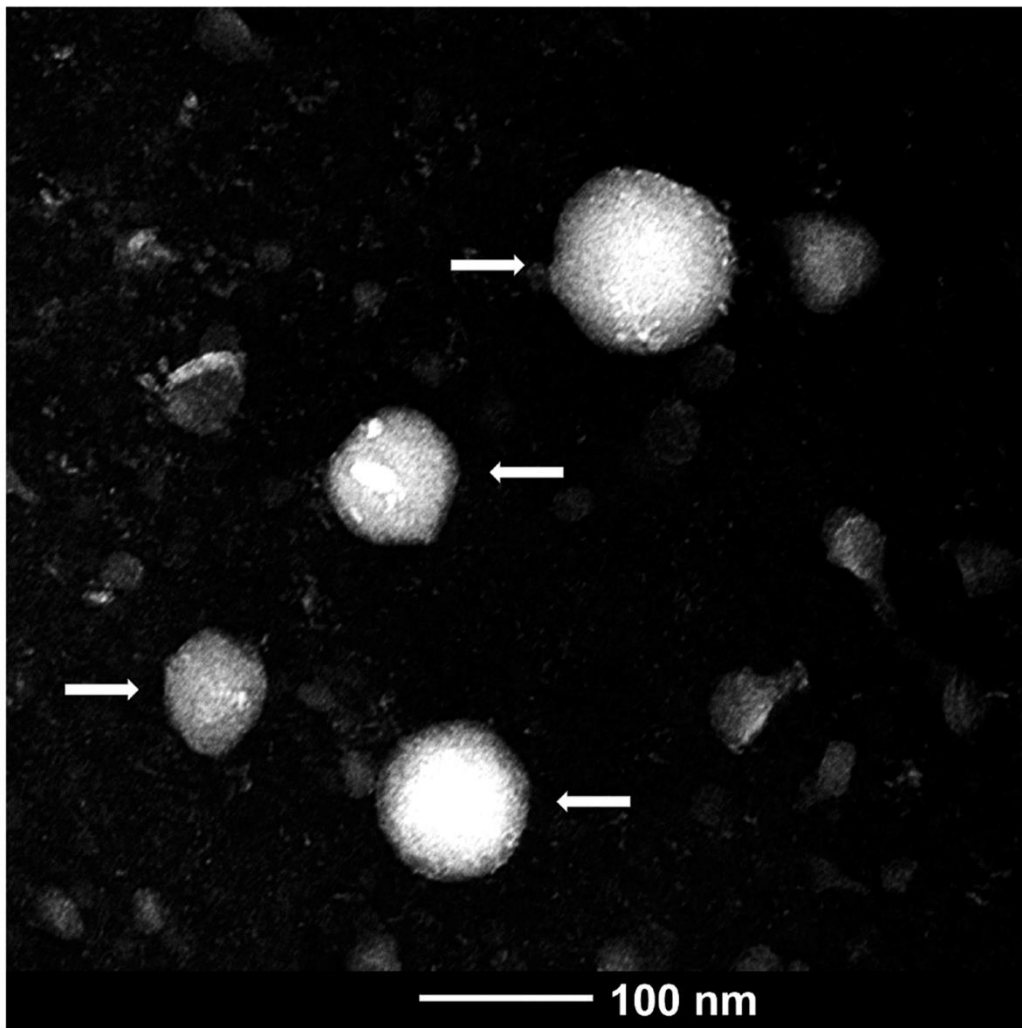

**Supplemental Figure S2. Morphological confirmation of exosomes isolated from urine samples.** Transmission electron microscopy was performed to investigate the size and structure of the urinary exosomes. The arrows indicate the presence of vesicles of approximately 30-100 nm in diameter indicative of exosomes. The scale bar =100 nm.
